# Supplementary material for: Rigorous coupled-wave analysis of absorption enhancement in vertically illuminated silicon photodiodes with photon-trapping hole arrays
Source: publisher site journal article supplement (doi:10.1515/nanoph-2019-0164), 2019-09-25
Supplement: Supplementary file 1 [file Revised supplementary material.doc]

Rigorous coupled-wave analysis of absorption enhancement in vertically illuminated silicon photodiodes with photon-trapping hole arrays

***Supplementary material***

Jun Gou1,2, Hilal Cansizoglu1, Cesar Bartolo-Perez1, Soroush Ghandiparsi1, Ahmed S. Mayet1, Hossein Rabiee-Golgir1, Yang Gao1, Jun Wang2, Toshishige Yamada3,4, Ekaterina Ponizovskaya Devine3, Aly F. Elrefaie1,3, Shih-Yuan Wang3, and M. Saif Islam1,*

1Electrical and Computer Engineering, University of California - Davis, Davis, CA 95618, USA

2State Key Laboratory of Electronic Thin Films and Integrated Devices, University of Electronic Science and Technology of China, Chengdu 610054, China

3W&WSens Devices, Inc., 4546 El Camino, Suite 215, Los Altos, CA 94022, USA

4Electrical Engineering, Baskin School of Engineering, University of California, Santa Cruz, Santa Cruz, CA 95064, USA

*sislam@ucdavis.edu

**S1. Formulation of rigorous coupled-wave analysis (RCWA)**

Fig. S1 shows a schematic representation of a crossed grating with hole array in hexagonal lattice. In the attached rectangular Cartesian coordinate system, the *x* and *y* axes are parallel to periodic directions, and the *z* axis is perpendicular to the grating plane. The device is divided into three layers along the *z* direction: the incident layer (I: air, ), the grating layer (II: silicon with hole array, ), and the substrate layer (III: Si for bulk wafer or Si on SiO2 film for the SOI wafer, ). The propagation direction of the incident plane wave is given by polar angle *θ*, azimuthal angle *φ*, and polarization angle *ψ*.

**
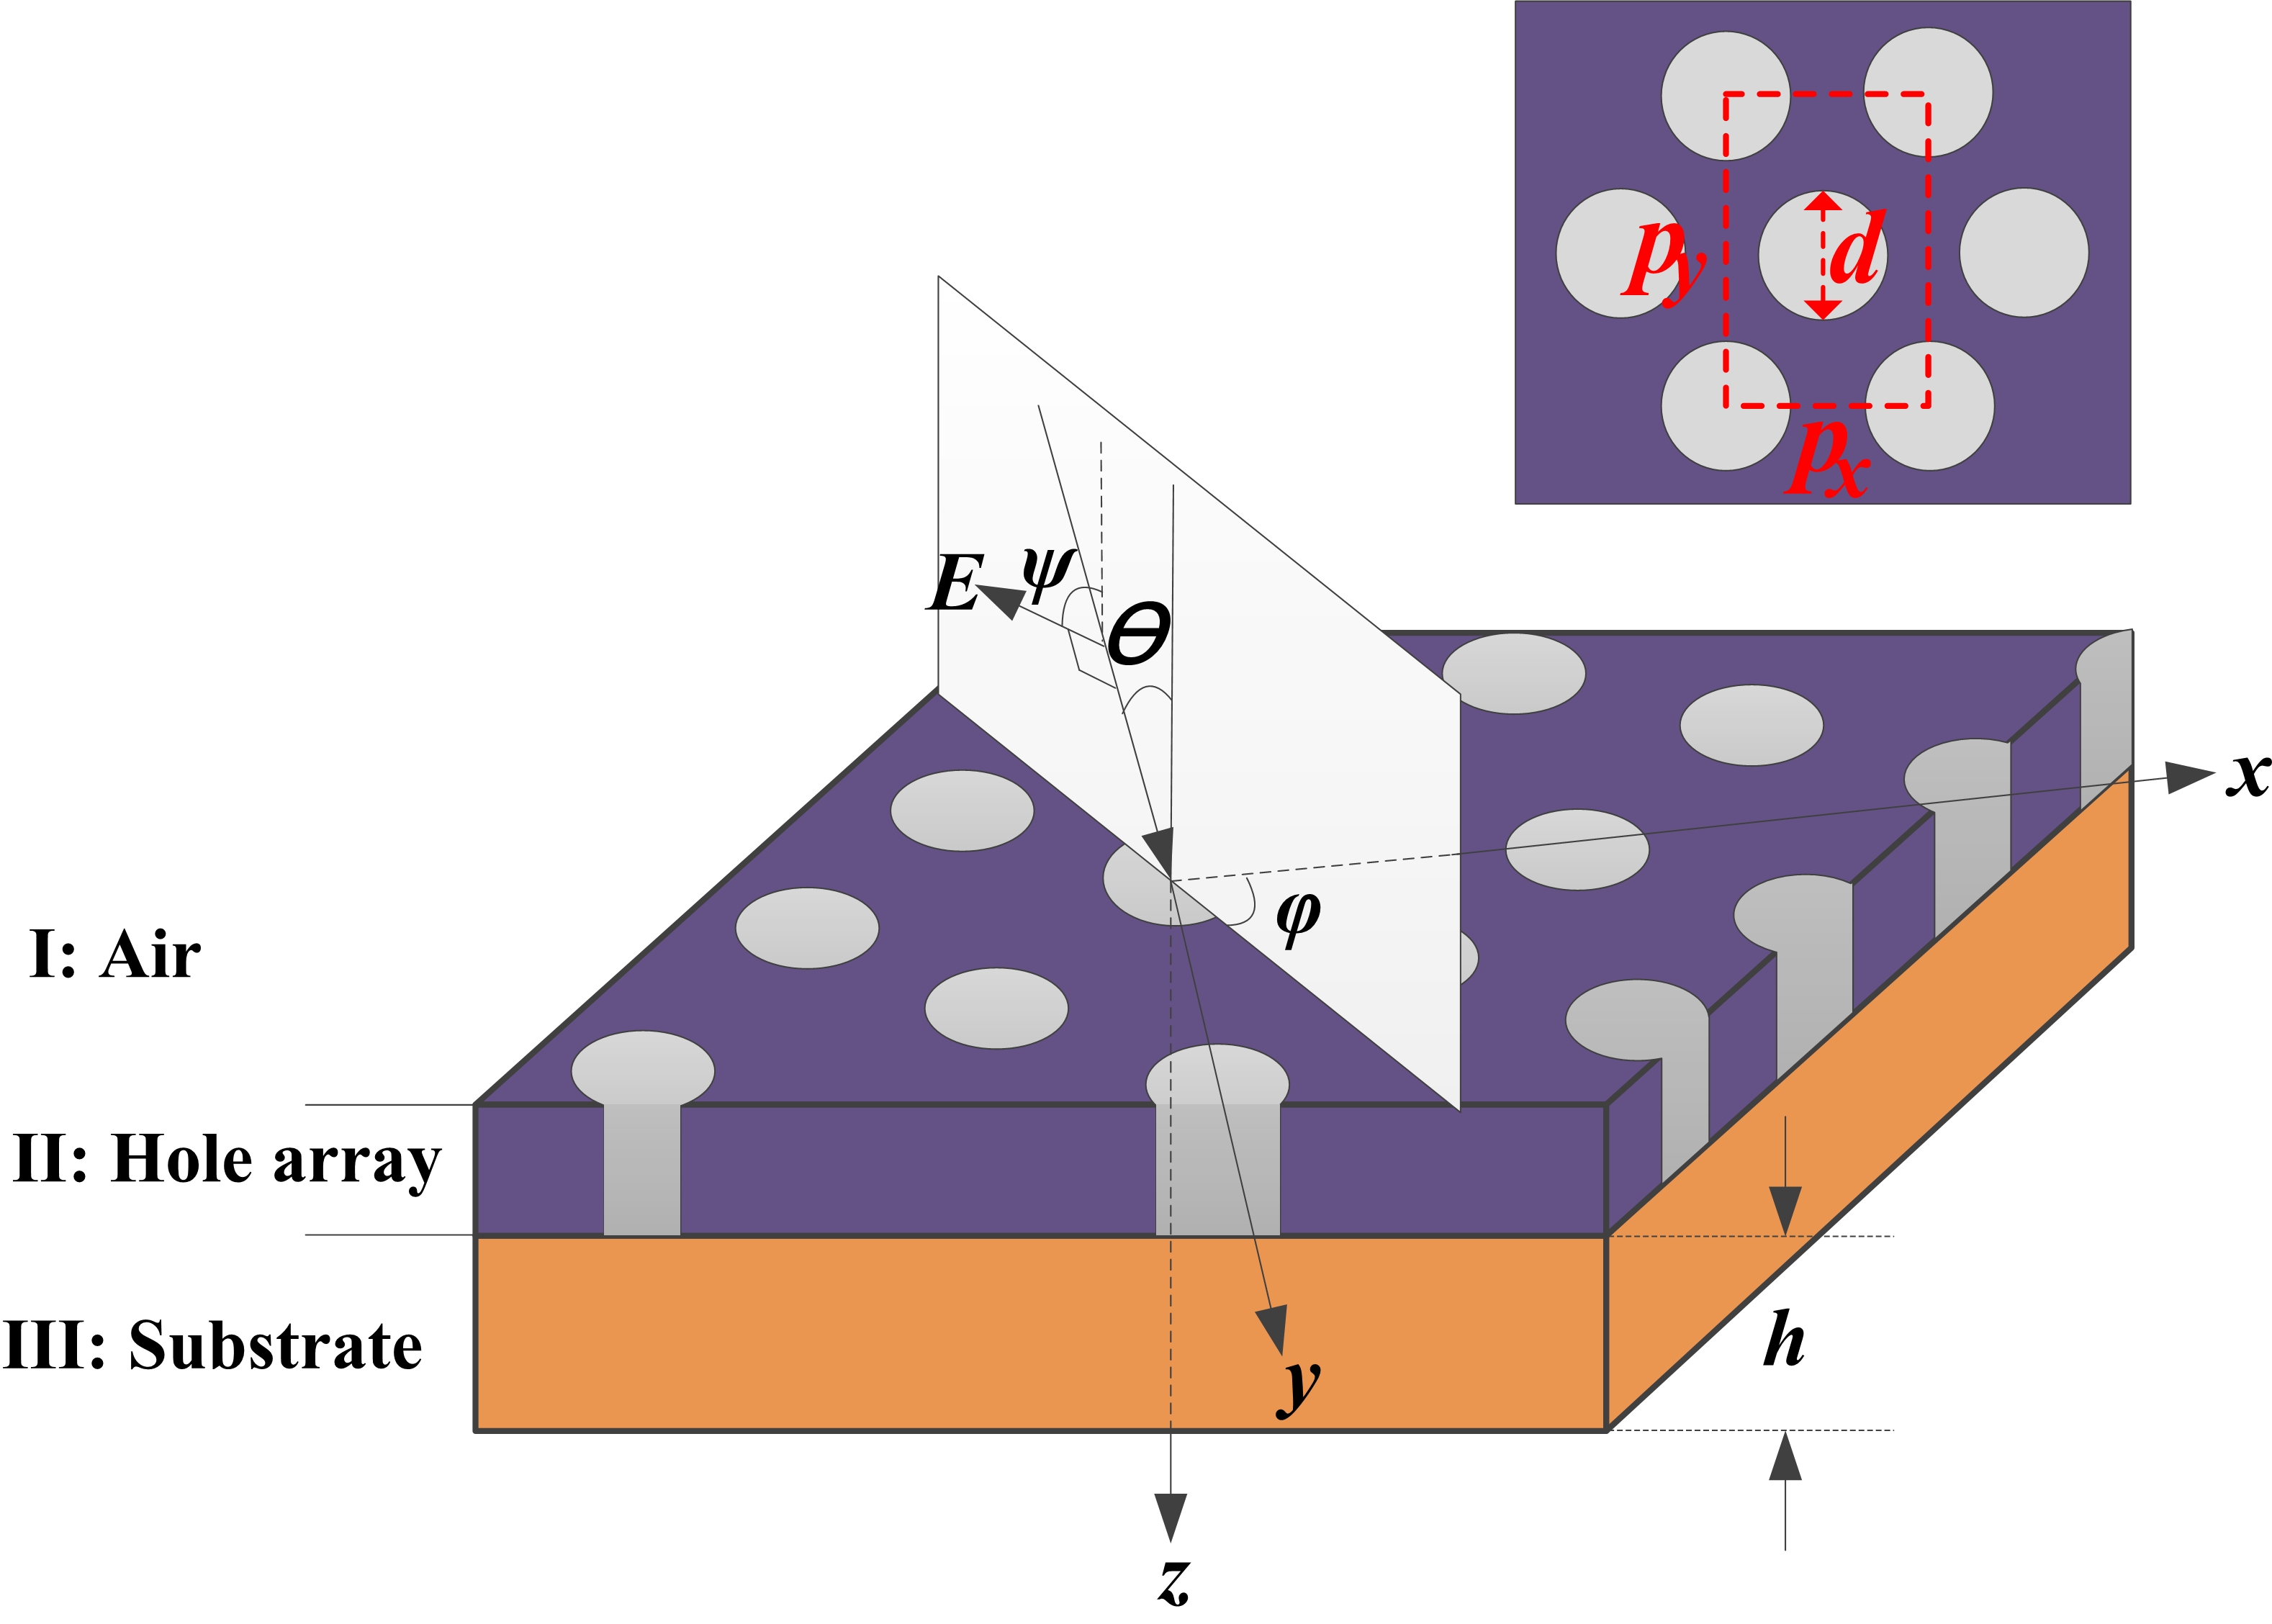
**

Fig. S1 Periodic hole array in hexagonal lattice illuminated by a plane wave with a rectangular Cartesian coordinate system added for clarity.

The unit electric field of the incident plane wave in layer I is expressed as

(1)

where *u* is the unit electric-field vector,

(2)

where *ex*, *ey*, and *ez* are the unit basis vectors along *x*, *y* and *z* axis, respectively.

The electric fields in layer I and layer III can be written as, respectively,

(3)

(4)

where *Rmn* and *Tmn* are the normalized electric field of the [m n] order reflected wave in layer I and transmitted wave in layer III, respectively. The wave vectors *kxm*, *kyn*, *k*I*,zmn*, *k*III*,zmn* are, respectively,

(5a)

(5b)

(5c)

In layer I, *n*I=*ni*=*nair*, in layer III, *n*III= *n*Si.

The electric field and magnetic field in layer II (grating layer) can be expressed in terms of spatial harmonics by Fourier series expansion, respectively,

(6)

(7)

where *Smn*(*z*), *Umn*(*z*) are the amplitudes of normalized electric field vector and magnetic field vector of [m n] order spatial harmonic.

The time dependence of exp(*iωt*) is assumed. In layer II,

(8)

(9)

where *ε*(*x*,*y*)is thepermittivity of the grating layer which is represented by means of Fourier expansion. The electric field can be decomposed into normal component (*EN*) and tangential component (*ET*). The electric displacement (*D*) can be written as *D*=[*ε*(*x*,*y*)]*ET*+[1/*ε*(*x*,*y*)]-1*EN*, where the brackets denote the formation of a Toeplitz-matrix out of a vector of Fourier components. At the boundaries (*z*=0 and *z*=*h*), *ET* is continuous and can be treated with Laurent’s rule. *EN* is discontinuous, but the normal component of the electric displacement (*DN*=[1/*ε*(*x*,*y*)]-1*EN*) is continuous and can be treated by the inverse rule [1,2]. Utilizing the boundary conditions of electromagnetic field at *z*=0 and *z*=*h*, the quantities *Sxmn*(*z*), *Symn*(*z*) ,*Uxmn*(*z*), *Uymn*(*z*) can be obtained by solving the Maxwell curl equations in Cartesian coordinates and represented by the eigenmodes, respectively,

(10)

(11)

(12)

(13)

where *λj* and *wlmn,j* (*l*=1, 2, 3, 4) are eigenvalues and eigenvectors, *gj* are coefficients determined from the boundary conditions. *λj* and *wlmn,j* can be obtained by solution of matrix eigenvalue problem with a size of 4*n*×4*n* using eig function in Matlab programs [3], where *n* is the number of spatial harmonics (orders) retained. Then, *Rmn* and *Tmn* can be solved by using the field equations to match the boundary conditions at grating interfaces (*z*=0 and *z*=*h*). Reflection diffraction efficiency (*ηRmn*) and transmission diffraction efficiency (*ηTmn*), defined as the power of reflected and transmitted light diffracted into a particular order [*m n*] to the incident power, can be calculated by, respectively,

(14)

(15)

where the subscripts *x*, *y*, and *z* represent the components of *Rmn* and *Tmn* along the *x*, *y*, and *z* directions, respectively. The absorption can be obtained by,

(16)

**S2. Reflection calculation at Si/SiO2 interface**

When a beam of light illuminates from the SOI device layer (*p*-Si) into SiO2 film with a refractive index of *n*SiO2=1.4721 at the wavelength of 850 nm [4], the critical angle of total reflection (*θc*) can be calculated as 23.79° using equation (17).

(17)

Therefore, the reflection () of transmitted wave (*TN*) in the SOI device layer at Si/SiO2 interface can be calculated by equation (18), depending on the deflection angle (*θN*) of the transmitted wave. In equation (18), is the refraction angle of light in SiO2 film. If *θN* ≥ *θc,* all the transmitted waves in the SOI device layer will be reflected by the SiO2 film ().

(18)

REFERENCES

[1] Li L. Use of Fourier series in the analysis of discontinuous periodic structures. J Opt Soc Am A 1996, 13(9), 1870–1876.

[2] Schuster T, Ruoff J, Kerwien N, Rafler S, Osten W. Normal vector method for convergence improvement using the RCWA for crossed gratings. J Opt Soc Am A 2007, 24(9), 2880–2890.

[3] Peng S, Morris GM. Resonant scattering from two-dimensional gratings. J Opt Soc Am A 1996, 13(5), 993–1005.

[4] Gao L, Lemarchand F, Lequime M. Refractive index determination of SiO2 layer in the UV/Vis/NIR range: spectrophotometric reverse engineering on single and bi-layer designs. J Europ Opt Soc Rap Public 2013, 8, 13010.
