# Supplementary material for: Rigorous coupled-wave analysis of absorption enhancement in vertically illuminated silicon photodiodes with photon-trapping hole arrays
Source: publisher site journal article supplement (doi:10.1515/nanoph-2019-0164), 2019-09-25
Supplement: Supplementary file 1 [file Revised supplementary material.pdf › Supplement/Revised supplementary material.pdf]

# **Rigorous coupled-wave analysis of absorption enhancement in vertically illuminated silicon photodiodes with photon-trapping hole arrays**

## ***Supplementary material***

Jun Gou<sup>1,2</sup>, Hilal Cansizoglu<sup>1</sup>, Cesar Bartolo-Perez<sup>1</sup>, Soroush Ghandiparsi<sup>1</sup>, Ahmed S. Mayet<sup>1</sup>, Hossein Rabiee-Golgir<sup>1</sup>, Yang Gao<sup>1</sup>, Jun Wang<sup>2</sup>, Toshishige Yamada<sup>3,4</sup>, Ekaterina Ponizovskaya Devine<sup>3</sup>, Aly F. Elrefaie<sup>1,3</sup>, Shih-Yuan Wang<sup>3</sup>, and M. Saif Islam<sup>1,\*</sup>

<sup>1</sup>Electrical and Computer Engineering, University of California - Davis, Davis, CA 95618, USA

<sup>2</sup>State Key Laboratory of Electronic Thin Films and Integrated Devices, University of Electronic Science and Technology of China, Chengdu 610054, China

<sup>3</sup>W&WSens Devices, Inc., 4546 El Camino, Suite 215, Los Altos, CA 94022, USA

<sup>4</sup>Electrical Engineering, Baskin School of Engineering, University of California, Santa Cruz, Santa Cruz, CA 95064, USA

\*sislam@ucdavis.edu

## S1. Formulation of rigorous coupled-wave analysis (RCWA)

Fig. S1 shows a schematic representation of a crossed grating with hole array in hexagonal lattice. In the attached rectangular Cartesian coordinate system, the  $x$  and  $y$  axes are parallel to periodic directions, and the  $z$  axis is perpendicular to the grating plane. The device is divided into three layers along the  $z$  direction: the incident layer (I: air,  $z < 0$ ), the grating layer (II: silicon with hole array,  $0 \leq z \leq h$ ), and the substrate layer (III: Si for bulk wafer or Si on  $\text{SiO}_2$  film for the SOI wafer,  $z > h$ ). The propagation direction of the incident plane wave is given by polar angle  $\theta$ , azimuthal angle  $\phi$ , and polarization angle  $\psi$ .

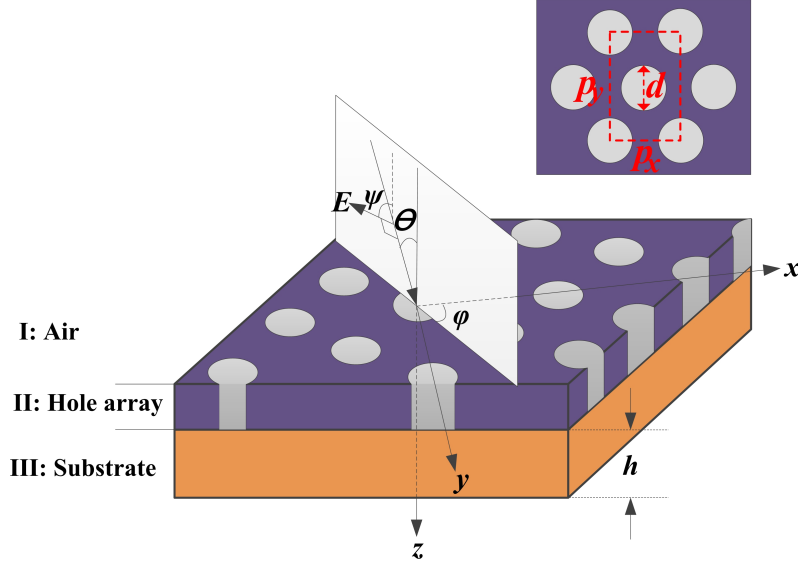

Fig. S1 Periodic hole array in hexagonal lattice illuminated by a plane wave with a rectangular Cartesian coordinate system added for clarity.

The unit electric field of the incident plane wave in layer I is expressed as

$$E_{inc}(x, y, z) = u \exp[-ik_0 n_i (\sin \theta \cos \phi x + \sin \theta \sin \phi y + \cos \theta z)] \quad (1)$$

where  $u$  is the unit electric-field vector,

$$u = (\cos \psi \cos \theta \cos \phi - \sin \psi \sin \phi) e_x + (\cos \psi \cos \theta \sin \phi + \sin \psi \cos \phi) e_y + (-\cos \psi \sin \theta) e_z \quad (2)$$

where  $e_x$ ,  $e_y$ , and  $e_z$  are the unit basis vectors along  $x$ ,  $y$  and  $z$  axis, respectively.

The electric fields in layer I and layer III can be written as, respectively,

$$E_I(x, y, z) = E_{inc}(x, y, z) + \sum_m \sum_n R_{mn} \exp[-i(k_{xm}x + k_{yn}y - k_{I,zmn}z)] \quad (3)$$

$$E_{III}(x, y, z) = \sum_m \sum_n T_{mn} \exp\{-i[k_{xm}x + k_{yn}y + k_{III,zmn}(z - h)]\} \quad (4)$$

where  $R_{mn}$  and  $T_{mn}$  are the normalized electric field of the  $[m \ n]$  order reflected wave in layer I and transmitted wave in layer III, respectively. The wave vectors  $k_{xm}$ ,  $k_{yn}$ ,  $k_{I,zmn}$ ,  $k_{III,zmn}$  are, respectively,

$$k_{xm} = k_0 n_i \sin \theta \cos \phi - \frac{2\pi m}{p_x} \quad (5a)$$

$$k_{yn} = k_0 n_i \sin \theta \sin \varphi - \frac{2\pi n}{p_y} \quad (5b)$$

$$k_{l,zmn} = \begin{cases} \sqrt{k_0^2 n_l^2 - k_{xm}^2 - k_{yn}^2} & k_{xm}^2 + k_{yn}^2 \leq k_0^2 n_l^2 \\ -i\sqrt{k_{xm}^2 + k_{yn}^2 - k_0^2 n_l^2} & k_{xm}^2 + k_{yn}^2 > k_0^2 n_l^2 \end{cases} \quad l = \text{I, III} \quad (5c)$$

In layer I,  $n_{\text{I}}=n_i=n_{\text{airs}}$ , in layer III,  $n_{\text{III}}=n_{\text{Si}}$ .

The electric field and magnetic field in layer II (grating layer) can be expressed in terms of spatial harmonics by Fourier series expansion, respectively,

$$E_{\text{II}}(x, y, z) = \sum_m \sum_n [S_{xmn}(z)e_x + S_{ymn}(z)e_y + S_{zmn}(z)e_z] \exp[-i(k_{xm}x + k_{yn}y)] \quad (6)$$

$$H_{\text{II}}(x, y, z) = -i\sqrt{\frac{\varepsilon_0}{\mu_0}} \sum_m \sum_n [U_{xmn}(z)e_x + U_{ymn}(z)e_y + U_{zmn}(z)e_z] \exp[-i(k_{xm}x + k_{yn}y)] \quad (7)$$

where  $S_{mn}(z)$ ,  $U_{mn}(z)$  are the amplitudes of normalized electric field vector and magnetic field vector of  $[m \ n]$  order spatial harmonic.

The time dependence of  $\exp(i\omega t)$  is assumed. In layer II,

$$\nabla \times E_{\text{II}} = -i\omega\mu_0 H_{\text{II}} \quad (8)$$

$$\nabla \times H_{\text{II}} = i\omega\varepsilon(x, y)E_{\text{II}} \quad (9)$$

where  $\varepsilon(x, y)$  is the permittivity of the grating layer which is represented by means of Fourier expansion. The electric field can be decomposed into normal component ( $E_N$ ) and tangential component ( $E_T$ ). The electric displacement ( $D$ ) can be written as  $D=[\varepsilon(x, y)]E_T+[1/\varepsilon(x, y)]^{-1}E_N$ , where the brackets denote the formation of a Toeplitz-matrix out of a vector of Fourier components. At the boundaries ( $z=0$  and  $z=h$ ),  $E_T$  is continuous and can be treated with Laurent's rule.  $E_N$  is discontinuous, but the normal component of the electric displacement ( $D_N=[1/\varepsilon(x, y)]^{-1}E_N$ ) is continuous and can be treated by the inverse rule [1,2]. Utilizing the boundary conditions of electromagnetic field at  $z=0$  and  $z=h$ , the quantities  $S_{xmn}(z)$ ,  $S_{ymn}(z)$ ,  $U_{xmn}(z)$ ,  $U_{ymn}(z)$  can be obtained by solving the Maxwell curl equations in Cartesian coordinates and represented by the eigenmodes, respectively,

$$S_{xmn}(z) = \sum_j g_j w_{1mn,j} \exp(\lambda_j z) \quad (10)$$

$$S_{ymn}(z) = \sum_j g_j w_{2mn,j} \exp(\lambda_j z) \quad (11)$$

$$U_{xmn}(z) = \sum_j g_j w_{3mn,j} \exp(\lambda_j z) \quad (12)$$

$$U_{ymn}(z) = \sum_j g_j w_{4mn,j} \exp(\lambda_j z) \quad (13)$$

where  $\lambda_j$  and  $w_{lmn,j}$  ( $l=1, 2, 3, 4$ ) are eigenvalues and eigenvectors,  $g_j$  are coefficients determined from the boundary conditions.  $\lambda_j$  and  $w_{lmn,j}$  can be obtained by solution of matrix eigenvalue problem with a size of  $4n \times 4n$  using eig function in Matlab programs [3], where  $n$  is the number of spatial harmonics (orders) retained. Then,  $R_{mn}$  and  $T_{mn}$  can be solved by using the field equations to match the boundary conditions at grating interfaces ( $z=0$  and  $z=h$ ). Reflection diffraction efficiency ( $\eta_{Rmn}$ ) and transmission diffraction efficiency ( $\eta_{Tmn}$ ), defined as the power of reflected and transmitted light diffracted into a particular order  $[m \ n]$  to the incident power, can be calculated by, respectively,

$$\eta_{Rmn} = \text{Re}\left(\frac{k_{l,zmn}}{k_0 n_i \cos \theta}\right) (|R_{xmn}|^2 + |R_{ymn}|^2 + |R_{zmn}|^2) \quad (14)$$

$$\eta_{Tmn} = \text{Re}\left(\frac{k_{l,zmn}}{k_0 n_i \cos \theta}\right) (|T_{xmn}|^2 + |T_{ymn}|^2 + |T_{zmn}|^2) \quad (15)$$

where the subscripts  $x$ ,  $y$ , and  $z$  represent the components of  $R_{mn}$  and  $T_{mn}$  along the  $x$ ,  $y$ , and  $z$  directions, respectively. The absorption can be obtained by,

$$A = 1 - \sum_m \sum_n (\eta_{Rmn} + \eta_{Tmn}) \quad (16)$$

## S2. Reflection calculation at Si/SiO<sub>2</sub> interface

When a beam of light illuminates from the SOI device layer ( $p$ -Si) into SiO<sub>2</sub> film with a refractive index of  $n_{\text{SiO}_2}=1.4721$  at the wavelength of 850 nm [4], the critical angle of total reflection ( $\theta_c$ ) can be calculated as  $23.79^\circ$  using equation (17).

$$\sin \theta_c = \frac{n_{\text{SiO}_2}}{n_{\text{Si}}} \quad (17)$$

Therefore, the reflection ( $R'_N$ ) of transmitted wave ( $T_N$ ) in the SOI device layer at Si/SiO<sub>2</sub> interface can be calculated by equation (18), depending on the deflection angle ( $\theta_N$ ) of the transmitted wave. In equation (18),  $\theta_{RN} = \arcsin\left(\frac{n_{\text{Si}} \sin \theta_N}{n_{\text{SiO}_2}}\right)$  is the refraction angle of light in SiO<sub>2</sub> film. If  $\theta_N \geq \theta_c$ , all the transmitted waves in the SOI device layer will be reflected by the SiO<sub>2</sub> film ( $R'_N = 1$ ).

$$R'_N = \begin{cases} \frac{(n_{\text{Si}} - n_{\text{SiO}_2})^2}{(n_{\text{Si}} + n_{\text{SiO}_2})^2} & \theta_N = 0 \\ \frac{\sin^2(\theta_N - \theta_{RN}) \left(1 + \frac{\cos^2(\theta_N + \theta_{RN})}{\cos^2(\theta_N - \theta_{RN})}\right)}{2 \sin^2(\theta_N + \theta_{RN})} & 0 < \theta_N < \theta_c \\ 1 & \theta_N \geq \theta_c \end{cases} \quad (18)$$

## REFERENCES

- [1] Li L. Use of Fourier series in the analysis of discontinuous periodic structures. J Opt Soc Am A 1996, 13(9), 1870–1876.

- [2] Schuster T, Ruoff J, Kerwien N, Rafler S, Osten W. Normal vector method for convergence improvement using the RCWA for crossed gratings. *J Opt Soc Am A* 2007, 24(9), 2880–2890.
- [3] Peng S, Morris GM. Resonant scattering from two-dimensional gratings. *J Opt Soc Am A* 1996, 13(5), 993–1005.
- [4] Gao L, Lemarchand F, Lequime M. Refractive index determination of SiO<sub>2</sub> layer in the UV/Vis/NIR range: spectrophotometric reverse engineering on single and bi-layer designs. *J Europ Opt Soc Rap Public* 2013, 8, 13010.
